# Supplementary material for: Lactobacillus fermentumF40-4 ameliorates hyperuricemia by modulating the gut microbiota and alleviating inflammation in mice
Source: Royal Society of Chemistry journal article supplement (doi:10.1039/d2fo03701g), 2023-01-01
Supplement: d2fo03701g1.pdf [file d2fo03701g1.pdf]

## Supplementary Material

**Table S1** Detection conditions for HPLC analysis.

| Parameters              | Conditions                                      |
|-------------------------|-------------------------------------------------|
| Chromatographic column  | ZORBAX Eclipse Plus C18, 5-Micron, 4.6×250 mm   |
| Mobile phase            | 20 mmol/L isogradient phosphate buffer solution |
| Column temperature      | 25°C                                            |
| UV detection wavelength | 254 nm                                          |
| Flow rate               | 1 mL/min                                        |
| Elution time            | 45 min                                          |
